# Supplementary material
Source: PubMed Central journal article supplement (PMC1366779)
Supplement: biophysj_105.063800_1.pdf [file biophysj_105.063800_1.pdf]

**Supplementary material for Rainey & Sykes – Optimizing Oriented Planar  
Supported Lipid Samples for Solid-State Protein NMR (2 pages).**

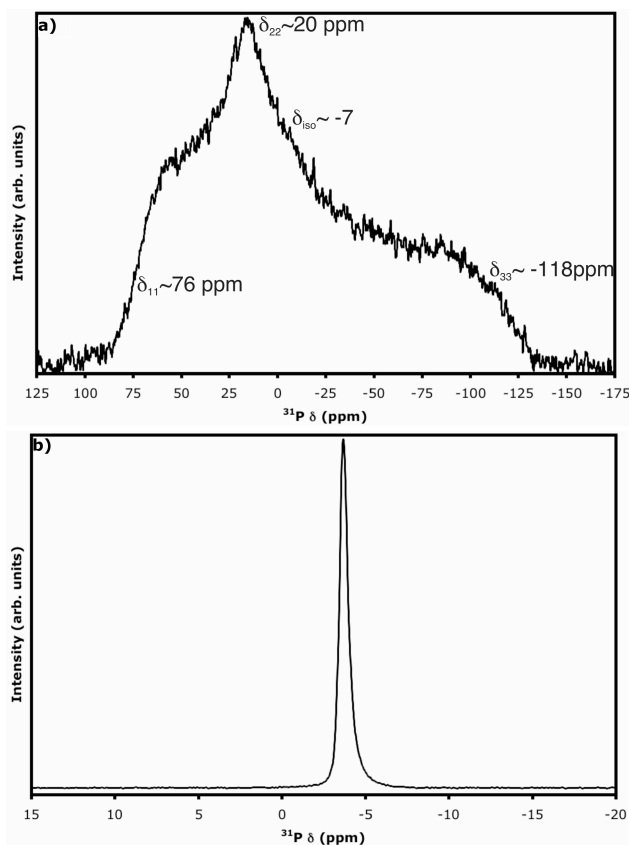

**Figure 1.** Static solid-state  $^{31}\text{P}$ -NMR spectra acquired in homebuilt 6-turn 15x15x1.5 mm (inner dimensions) rectangular flattened copper wire coil. Samples were contained within a hollowed plastic rectangular form glued to two sheets of mica. (a)  $\sim 100$  mg egg phosphatidylcholine; (b)  $\sim 200$   $\mu\text{L}$  of 1 M phosphate buffer (pH  $\sim 4.7$ ). Chemical shift values shown in (a) provide good simulation of lineshape using SIMPSON.

**Table 1 (see following page).** Lipid film morphologies observed from the set of eight solvents with varying dielectric constant ( $\epsilon$ ) used to test characteristics of lipid film morphology as cast on freshly cleaved muscovite mica.<sup>a</sup>

| Solvent            | $\epsilon^b$       | POPC deposit morphology                                                                                         | POPG deposit morphology                                                                                                                 | DOPA deposit morphology                                                                                                       | DOPE deposit morphology                                                                                                             |
|--------------------|--------------------|-----------------------------------------------------------------------------------------------------------------|-----------------------------------------------------------------------------------------------------------------------------------------|-------------------------------------------------------------------------------------------------------------------------------|-------------------------------------------------------------------------------------------------------------------------------------|
| Chloroform         | 4.81               | Localized clumps of transparent lipid.                                                                          | Translucent film of localized, cloudy deposits. <sup>d</sup>                                                                            | Localized film of transparent or translucent lipid. Layers apparent from separate aliquot application.                        | Poor plate coverage. Translucent lipid film.                                                                                        |
| Dichloromethane    | 9.00 <sup>c</sup>  | Localized clumps of transparent lipid with improved spread compared to $\text{CHCl}_3$                          | Sparingly soluble. Localized white clumps; some opaque film with small bubbles. <sup>d</sup>                                            | Transparent lipid film spread about application point.                                                                        | Transparent lipid film spread about application point.                                                                              |
| 3-Pentanol         | 14.07 <sup>c</sup> | Tiny droplets of transparent lipid, dispersed well over wetted area                                             | Not soluble.                                                                                                                            | Transparent film covering entire plate, islands of raised lipid.                                                              | Improved coverage by translucent film, some bubbles.                                                                                |
| HEHP               | 16.70              | Semi-translucent film with very good plate coverage. Noticeable void area around point of solution application. | Translucent/white film with complete coverage. Small islands of elevated lipid. Void at point of application. Lipid collected at edges. | Sparingly soluble. Translucent film with many tiny bubble defects. Noticeable void area around point of solution application. | Translucent lipid film with full plate coverage and raised lipid islands over entire film. No consistent void at application point. |
| 2-Propanol         | 20.18              | Semi-translucent film with very good plate coverage. Major void area around point of solution application.      | Not soluble.                                                                                                                            | Not soluble.                                                                                                                  | Not soluble.                                                                                                                        |
| Ethanol            | 25.30              | Semi-translucent film of lipid with many tiny bubble defects, very well dispersed over plate                    | Not soluble.                                                                                                                            | Not soluble.                                                                                                                  | Not soluble.                                                                                                                        |
| TFE                | 27.68              | Translucent film of lipid with larger bubble defect                                                             | Not soluble.                                                                                                                            | Not soluble.                                                                                                                  | Translucent film covering entire plate with many lipid islands and ridges at plate edges.                                           |
| Methanol           | 33.00              | Many islands of elevated lipid spread over plate                                                                | Not soluble.                                                                                                                            | Not soluble.                                                                                                                  | Not soluble.                                                                                                                        |
| Water <sup>e</sup> | 80.10              | Elevated striations of lipid spread over film covering plate; semi-translucent.                                 | Elevated striations of lipid spread over film covering plate; semi-translucent.                                                         | Elevated striations (thinner than POPC or POPG) of lipid spread over film covering plate; semi-translucent.                   | Not soluble at 21°C.                                                                                                                |

<sup>a)</sup> ~ Experiment dependent amounts (1.25-10 mg) of POPC, POPG, DOPA and DOPE were deposited per 15x15 mm plate of mica in 20  $\mu\text{L}$  aliquots of 50-75 mg/mL at 23°C. Film morphologies observed after 14 or more hours in funnehood and remain the same after a further hour under vacuum. <sup>b)</sup>  $\epsilon$  at 20°C (Lide, 2001). <sup>c)</sup>  $\epsilon$  calculated for 20°C from polynomial fit for temperature dependence (Lide, 2001). <sup>d)</sup> Solubility improved by adding 0.1% methanol and 0.05% water (weight % of POPG). <sup>e)</sup> Film from vesicle fusion, not solvent casting. Reference: Lide, D.R. editor. 2001. CRC Handbook of Chemistry and Physics. CRC Press: Boca Raton, FL.
